# Supplementary material
Source: publisher figshare collection journal article supplement (https://springernature.figshare.com/ndownloader/files/17717231)

**Additional file 3**

OTU accumulation curves expressed as the number of OTUs by number of reads from sequencing. D-dry tundra, W-wet tundra, C-control, S-snow manipulation.

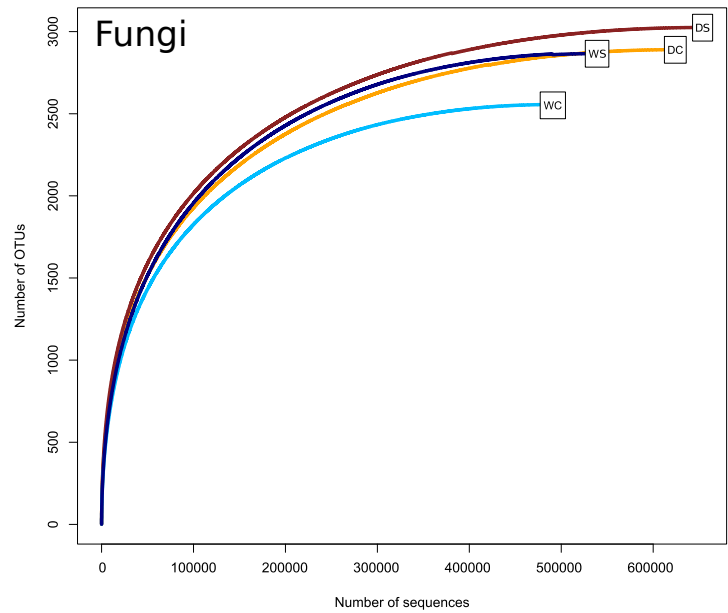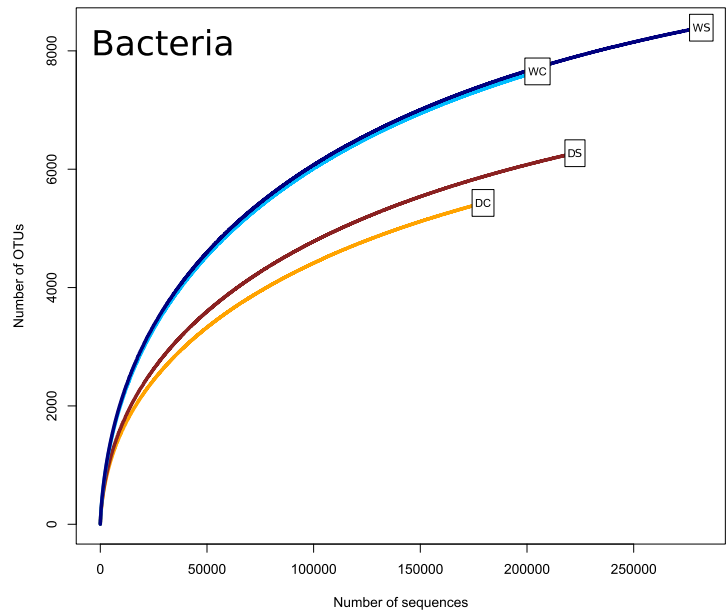

Supplement: Supplementary file [file 17717231]
